# Supplementary material for: Phase transformation in tungsten oxide nanoplates as a function of post-annealing temperature and its electrochemical influence on energy storage
Source: Nanoscale Adv. 2020 Aug 6;2(10):4689–701. doi: 10.1039/d0na00423e (PMC9416815; doi:10.1039/d0na00423e)
Supplement: NA-002-D0NA00423E-s001 [file NA-002-D0NA00423E-s001.pdf]

## **Supporting Information**

### **Phase transformation in tungsten oxide nanoplates as a function of post-annealing temperature and its electrochemical influence on energy storage**

**Shobhnath P. Gupta,<sup>a</sup> Harishchandra H. Nishad,<sup>a</sup> Sanjay D. Chakane,<sup>b</sup> Suresh W. Gosavi,<sup>c</sup>  
Dattatray J. Late,<sup>d</sup> Pravin S. Walke<sup>a,\*</sup>**

<sup>a</sup> National Centre for Nanoscience's and Nanotechnology, University of Mumbai, Mumbai-400098, India.

<sup>b</sup> Department of Physics, Arts, Science and Commerce College, Indapur, Pune-413106, Affiliated to Savitribai Phule Pune University, Pune-411007, India.

<sup>c</sup> Department of Physics, Savitribai Phule Pune University, Pune-411007, India.

<sup>d</sup> Centre for Nanoscience and Nanotechnology, Amity University, Mumbai-410206, India.

\*Corresponding author: Tel: +918380832183, E-mail: [pravin.w@nano.mu.ac.in](mailto:pravin.w@nano.mu.ac.in);

[shivshripsw@gmail.com](mailto:shivshripsw@gmail.com) (Pravin Walke)

**Contains:**

**Numerical methods.**

**Figures S1 to S4.**

## A. Numerical Methods

1. Specific capacitance calculated from CV curve as given as:

$$C = \frac{\int_{V_a}^{V_b} IdV}{mV(V_b - V_a)} \quad (1)$$

Where,  $IdV$  is total area under the CV curve at given potential range,  $m$  is mass of material,  $V$  is total scan range,  $V_a$  and  $V_b$  are initial and final voltage of given potential range in CV curve respectively.

2. Specific capacitance from charge discharge curve is given as:

$$C = \frac{I\Delta t}{m\Delta V} \quad (2)$$

where  $I/m$  is applied current density,  $\Delta t$  is discharge time,  $\Delta V$  is total applied voltage range.

3. The trasatti equation as follows:

$$1/q^*(\nu) = 1/q_{total}^* + a\nu^{1/2} \quad (3)$$

Where,  $q^*$  is the maximum charge stored,  $\nu$  is scan rate,  $a$  is constant,  $q_{total}^*$  is total charges stored at inner and outer surface of electrode.

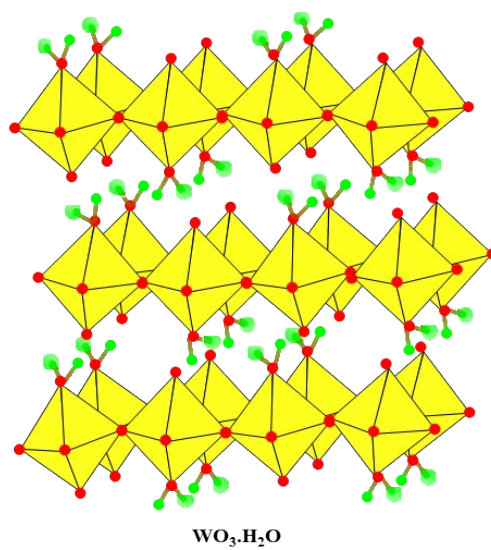

**Fig. S1.** Crystal structure of 2D layered  $\text{WO}_3 \cdot \text{H}_2\text{O}$  (W80).

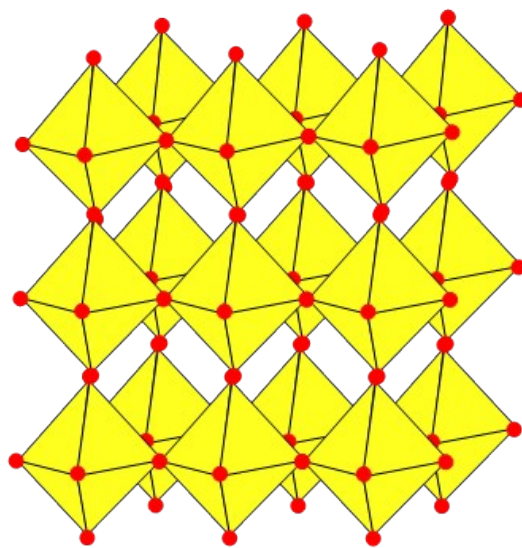

**Fig. S2.** Crystal structure of 3D monoclinic  $\text{WO}_3$  (W400).

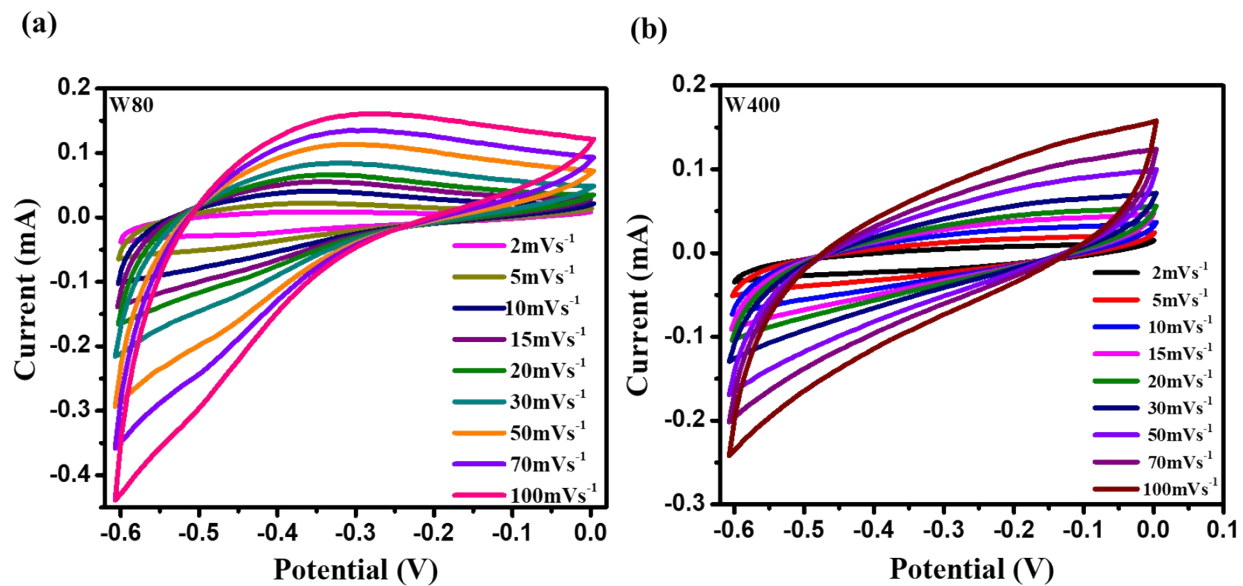

**Fig. S3.** Cyclic voltammetry curves of (a) W80, (b) W400 at various scan rates.

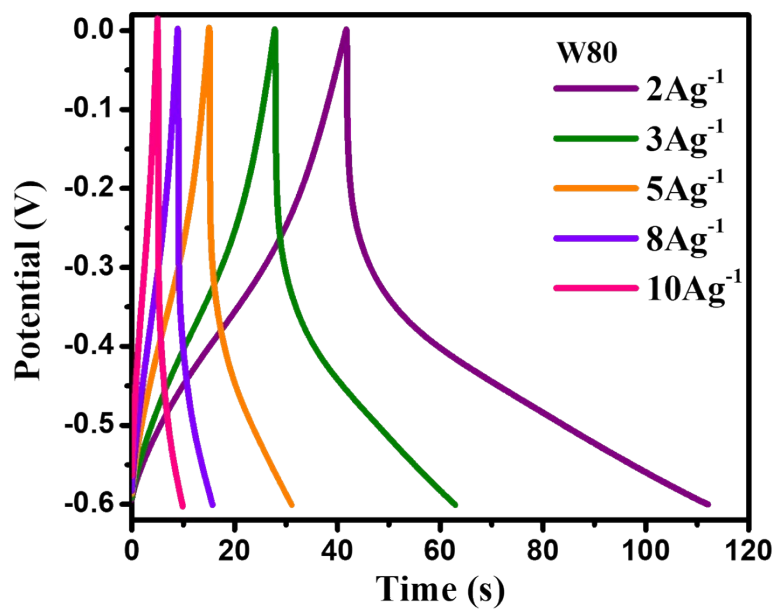

**Fig. S4.** Galvanostatics charge-discharge curves of W80 at various current densities.
